# Supplementary material
Source: PubMed Central journal article supplement (PMC2774833)

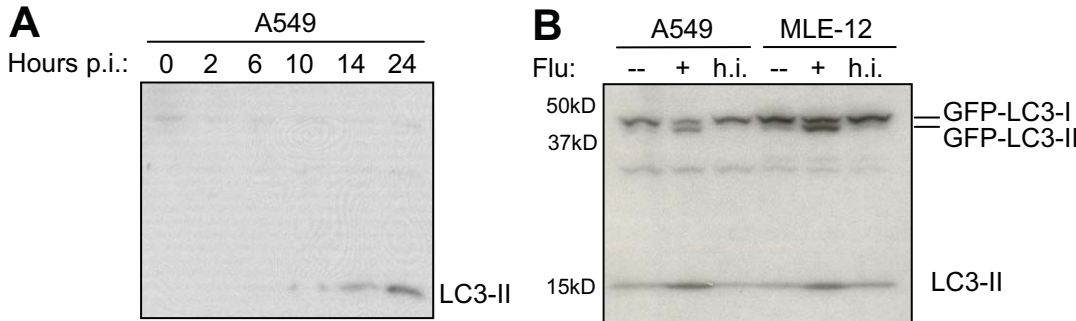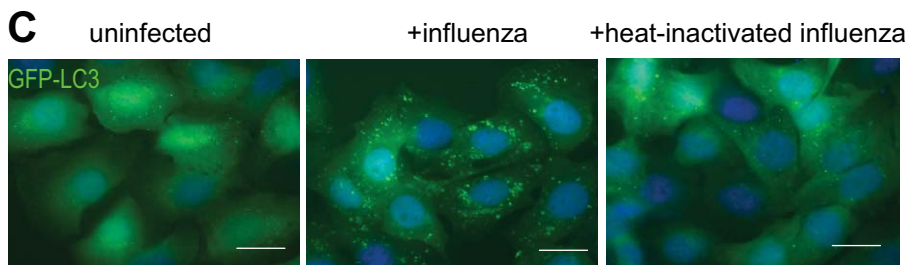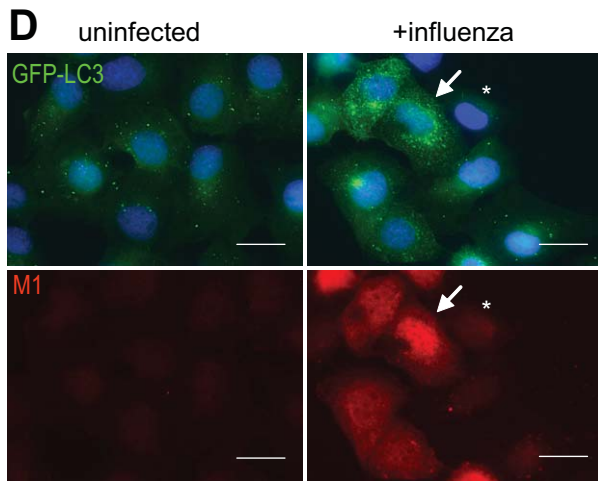

**A**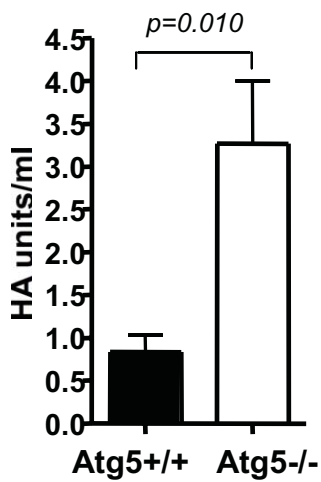**B**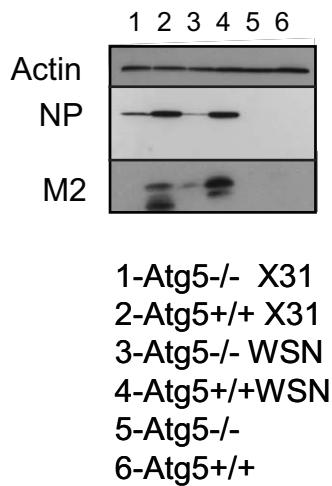**C**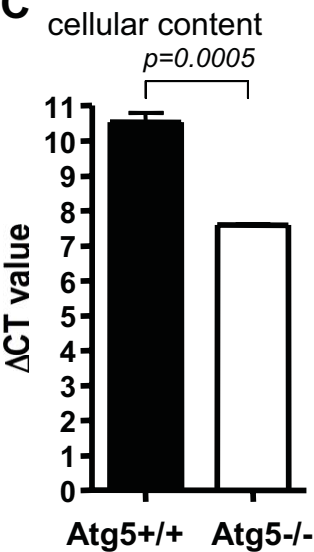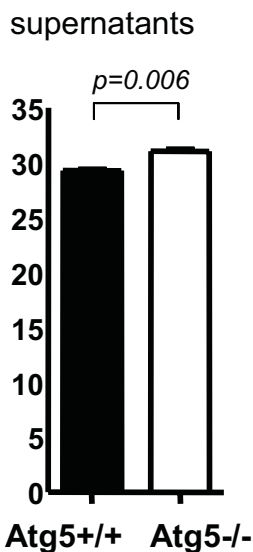**D**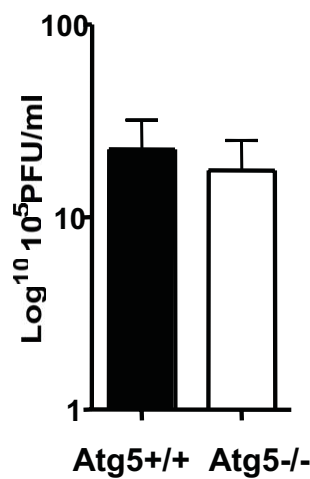

Supplement: NIHMS149879-supplement-01.pdf [file NIHMS149879-supplement-01.pdf]
